# Supplementary material for: Associations Between Hepatitis B Virus Infection and Risk of All Cancer Types
Source: PubMed Central journal article supplement (PMC6575146; doi:10.1001/jamanetworkopen.2019.5718), 2019-06-14

## Supplementary Online Content

Song C, Lv J, Liu Y, et al; China Kadoorie Biobank Collaborative Group. Associations between hepatitis B virus infection and risk of all cancer types. *JAMA Netw Open*. 2019;2(6):e195718. doi:10.1001/jamanetworkopen.2019.5718

**eTable 1.** *ICD-10* Codes for Specific Malignant Neoplasms

**eTable 2.** Baseline Characteristics of the CKB Participants According to the HBsAg Status

**eTable 3.** The Incidence Rates of Cancer in the CKB Cohort

**eTable 4.** Adjusted Odds Ratio for HBsAg Status and Stomach Cancer Risk in the Changzhou Nested Case-Control Study

**eTable 5.** Distribution of HBV DNA in Stomach Tumor Tissues

**eTable 6.** The Expression of Anti-HBc and HBx in Stomach, Pancreatic and Lung Cancer Tissues

**eFigure 1.** Results of PCR Tests Performed to Detect HBV DNA and cccDNA in the Tissues of all Stomach Cancer Subjects

**eFigure 2.** Anti-HBc and HBx Expression in Tissues of Stomach Cancer, Pancreatic Cancer, or Lung Cancer Using the IHC Test

This supplementary material has been provided by the authors to give readers additional information about their work.

| <b>eTable 1. ICD-10 Codes for Specific Malignant Neoplasms</b> |         |              |
|----------------------------------------------------------------|---------|--------------|
| Category                                                       | ICD-10  | Abbreviation |
| All cancer                                                     | C00-C97 | —            |
| Lip, oral cavity and pharynx cancer                            | C00-C14 | Oral cavity  |
| Esophagus cancer                                               | C15     | Esophagus    |
| Stomach cancer                                                 | C16     | Stomach      |
| Colon, Rectosigmoid junction and Rectum                        | C18-C20 | Colorectum   |
| Liver cancer                                                   | C22     | Liver        |
| Pancreas cancer                                                | C25     | Pancreas     |
| Trachea, Bronchus and Lung                                     | C33-C34 | Lung         |
| Breast cancer                                                  | C50     | Breast       |
| Cervix uteri cancer                                            | C53     | Cervix       |
| Endometrium cancer                                             | C54.1   | Endometrium  |
| Ovary cancer                                                   | C56     | Ovary        |
| Prostate cancer                                                | C61     | Prostate     |
| Bladder cancer                                                 | C67     | Bladder      |
| Lymphoma                                                       | C81-C85 | Lymphoma     |
| Leukemia                                                       | C91-C95 | Leukemia     |

*ICD-10, International Classification of Diseases-10.*

| <b>eTable 2.</b> Baseline Characteristics of the CKB Participants According to the HBsAg Status |                                   |                                |
|-------------------------------------------------------------------------------------------------|-----------------------------------|--------------------------------|
| Characteristic                                                                                  | All Participants<br>(n = 496,732) | HBsAg-positive<br>(n = 15,355) |
| Age, n (%)                                                                                      |                                   |                                |
| <50 years                                                                                       | 224,086 (45.1)                    | 8,311 (3.7)                    |
| ≥50 years                                                                                       | 272,646 (54.9)                    | 7,044 (2.6)                    |
| Sex, n (%)                                                                                      |                                   |                                |
| Women                                                                                           | 293,248 (59.0)                    | 8,300 (2.8)                    |
| Men                                                                                             | 203,484 (41.0)                    | 7,055 (3.5)                    |
| Area, n (%)                                                                                     |                                   |                                |
| Urban                                                                                           | 221,236 (44.5)                    | 7,848 (3.5)                    |
| Rural                                                                                           | 275,496 (55.5)                    | 7,507 (2.7)                    |
| Region, n (%)                                                                                   |                                   |                                |
| Qingdao (Urban)                                                                                 | 34,499 (6.9)                      | 1,030 (3.0)                    |
| Harbin (Urban)                                                                                  | 56,708 (11.4)                     | 1,134 (2.0)                    |
| Haikou (Urban)                                                                                  | 29,508 (5.9)                      | 1,543 (5.2)                    |
| Suzhou (Urban)                                                                                  | 51,511 (10.4)                     | 2,200 (4.3)                    |
| Liuzhou (Urban)                                                                                 | 49,010 (9.9)                      | 1,941 (4.0)                    |
| Pengzhou (Rural)                                                                                | 51,797 (10.4)                     | 949 (1.8)                      |
| Tianshui (Rural)                                                                                | 48,802 (9.8)                      | 914 (1.9)                      |
| Huixian (Rural)                                                                                 | 62,464 (12.6)                     | 2,152 (3.4)                    |
| Tongxiang (Rural)                                                                               | 53,353 (10.7)                     | 1,876 (3.5)                    |
| Liuyang (Rural)                                                                                 | 59,080 (11.9)                     | 1,616 (2.7)                    |
| Married, n (%)                                                                                  |                                   |                                |
| No                                                                                              | 46,715 (9.4)                      | 1,247 (2.7)                    |
| Yes                                                                                             | 450,017 (90.6)                    | 14,108 (3.1)                   |
| Educational level, n (%)                                                                        |                                   |                                |
| No formal education                                                                             | 90,335 (18.2)                     | 2,405 (2.6)                    |
| Primary school                                                                                  | 159,951 (32.2)                    | 4,706 (2.9)                    |
| Middle or high school                                                                           | 217,092 (43.7)                    | 7,448 (3.4)                    |
| College or university                                                                           | 29,354 (5.9)                      | 796 (2.7)                      |
| Household income, n (%)                                                                         |                                   |                                |
| <10,000 yuan/yr                                                                                 | 139,457 (28.1)                    | 3,670 (2.6)                    |
| 10,000—19,999 yuan/yr                                                                           | 144,915 (29.2)                    | 4,541 (3.1)                    |
| 20,000—34,999 yuan/yr                                                                           | 122,513 (24.7)                    | 4,075 (3.3)                    |
| ≥35,000 yuan/yr                                                                                 | 89,847 (18.1)                     | 3,069 (3.4)                    |
| Family history of cancer, n                                                                     |                                   |                                |
| No                                                                                              | 398,999 (82.7)                    | 11,964 (3.0)                   |
| Yes                                                                                             | 83,405 (17.3)                     | 3,025 (3.6)                    |
| Regular smoking, n (%)                                                                          |                                   |                                |
| Never                                                                                           | 336,462 (67.7)                    | 9,988 (3.0)                    |
| Current/Previous                                                                                | 160,270 (32.3)                    | 5,367 (3.3)                    |
| Regular alcohol intake, n                                                                       |                                   |                                |
| Never                                                                                           | 414,669 (83.5)                    | 12,714 (3.1)                   |
| Current/Previous                                                                                | 82,063 (16.5)                     | 2,641 (3.2)                    |
| Body mass index, n (%)                                                                          |                                   |                                |
| <24.0                                                                                           | 278,450 (56.1)                    | 8,961 (3.2)                    |
| 24.0-27.9                                                                                       | 165,359 (33.3)                    | 4,854 (2.9)                    |
| ≥28.0                                                                                           | 52,921 (10.7)                     | 1,540 (2.9)                    |

At exchange rate as of June 2017, 1 yuan is approximately equal to 0.15 U.S. dollars.

| <b>eTable 3.</b> The Incidence Rates of Cancer in the CKB Cohort                   |             |              |                     |                                      |                                              |
|------------------------------------------------------------------------------------|-------------|--------------|---------------------|--------------------------------------|----------------------------------------------|
| Rank                                                                               | Type        | No. of cases | No. of person-years | Crude-incidence (1/10 <sup>5</sup> ) | Standardized-incidence (1/10 <sup>5</sup> )* |
|                                                                                    | All         | 20,891       | 4,430,988           | 471.48                               | 422.21                                       |
| 1                                                                                  | Liver       | 1,775        | 4,430,988           | 40.06                                | 40.28                                        |
| 2                                                                                  | Lung        | 3,847        | 4,430,988           | 86.82                                | 78.23                                        |
| 3                                                                                  | Stomach     | 2,159        | 4,430,988           | 48.73                                | 47.08                                        |
| 4                                                                                  | Colorectum  | 2,139        | 4,430,988           | 48.27                                | 40.17                                        |
| 5                                                                                  | Breast      | 1,694        | 2,642,521           | 64.11                                | 52.04                                        |
| 6                                                                                  | Esophagus   | 1,589        | 4,430,988           | 35.86                                | 42.13                                        |
| 7                                                                                  | Oral cavity | 416          | 4,430,988           | 9.39                                 | 8.61                                         |
| 8                                                                                  | Lymphoma    | 369          | 4,430,988           | 8.33                                 | 7.58                                         |
| 9                                                                                  | Pancreas    | 505          | 4,430,988           | 11.4                                 | 9.4                                          |
| 10                                                                                 | Cervix      | 699          | 2,642,521           | 26.45                                | 25.92                                        |
| 11                                                                                 | Leukemia    | 430          | 4,430,988           | 9.7                                  | 8.73                                         |
| 12                                                                                 | Bladder     | 344          | 4,430,988           | 7.76                                 | 6.81                                         |
| 13                                                                                 | Ovary       | 263          | 2,642,521           | 9.95                                 | 8.91                                         |
| 14                                                                                 | Endometrium | 273          | 2,642,521           | 10.33                                | 8.35                                         |
| 15                                                                                 | Prostate    | 254          | 1,788,466           | 14.2                                 | 11.1                                         |
| * Standardized by age, sex and region based on the 2010 Chinese census population. |             |              |                     |                                      |                                              |

| <b>eTable 4.</b> Adjusted Odds Ratio for HBsAg Status and Stomach Cancer Risk in the Changzhou Nested Case-Control Study                                                         |                      |                  |                  |          |
|----------------------------------------------------------------------------------------------------------------------------------------------------------------------------------|----------------------|------------------|------------------|----------|
| Variable                                                                                                                                                                         | Stomach cancer cases | Healthy controls | OR (95% CI)      | <i>P</i> |
|                                                                                                                                                                                  | N (%)                | N (%)            |                  |          |
| HBsAg                                                                                                                                                                            |                      |                  |                  |          |
| Negative                                                                                                                                                                         | 94 (79.7)            | 412 (87.3)       | 1.00             | 0.04     |
| Positive                                                                                                                                                                         | 24 (20.3)            | 60 (12.7)        | 1.76 (1.04-2.98) |          |
| Logistic regression analyses were adjusted for age, sex, education level, household income, marital status, smoking status, alcohol consumption, family cancer history, and BMI. |                      |                  |                  |          |

**eTable 5.** Distribution of HBV DNA in Stomach Tumor Tissues

| Variable            | Jiangsu (n = 47) |                  | Zhejiang (n = 50) |                  | All patients (n = 97) |                  | P    |
|---------------------|------------------|------------------|-------------------|------------------|-----------------------|------------------|------|
|                     | HBV DNA positive | HBV DNA negative | HBV DNA positive  | HBV DNA negative | HBV DNA positive      | HBV DNA negative |      |
|                     | N (%)            | N (%)            | N (%)             | N (%)            | N (%)                 | N (%)            |      |
| All patients        | 12 (25.5)        | 35 (74.5)        | 19 (38.0)         | 31 (62.0)        | 31 (32.0)             | 66 (68.0)        | -    |
| HBV Status in serum |                  |                  |                   |                  |                       |                  |      |
| anti-HBc (+)        | 12 (54.5)        | 10 (45.5)        | 19 (54.3)         | 16 (45.7)        | 31 (54.4)             | 26 (45.6)        | -    |
| anti-HBc (-)        | 0 (0)            | 25 (100.0)       | 0 (0)             | 15 (100.0)       | 0 (0)                 | 40 (100.0)       |      |
| Gender              |                  |                  |                   |                  |                       |                  |      |
| Male                | 10 (27.8)        | 26 (72.2)        | 14 (37.8)         | 23 (62.2)        | 24 (32.9)             | 49 (67.2)        | 0.74 |
| Female              | 2 (18.2)         | 9 (81.8)         | 5 (38.5)          | 8 (61.5)         | 7 (21.2)              | 17 (70.8)        |      |
| Age                 |                  |                  |                   |                  |                       |                  |      |
| <60 years           | 1 (11.1)         | 8 (88.9)         | 8 (36.4)          | 14 (63.6)        | 9 (29.0)              | 22 (70.1)        | 0.67 |
| ≥60 years           | 11 (28.9)        | 27 (71.1)        | 11 (39.3)         | 17 (60.7)        | 22 (33.3)             | 44 (66.7)        |      |

P for chi-square test for differences between subgroups with different HBV, sex and age statuses.

**eTable 6.** The Expression of Anti-HBc and HBX in Stomach, Pancreatic and Lung Cancer Tissues

| ID | Sex    | Age at diagnosis | Diagnosis         | Sero-HBsAg | Sero-anti-HBc | Anti-HBc in tissue | HBX in tissue |
|----|--------|------------------|-------------------|------------|---------------|--------------------|---------------|
| 1  | Male   | 67               | Stomach cancer    | -          | +             | +                  | +             |
| 2  | Male   | 75               | Stomach cancer    | +          | +             | +                  | +             |
| 3  | Male   | 59               | Stomach cancer    | -          | +             | +                  | +             |
| 4  | Male   | 65               | Stomach cancer    | -          | +             | +                  | +             |
| 5  | Male   | 61               | Stomach cancer    | -          | +             | +                  | +             |
| 6  | Female | 50               | Stomach cancer    | -          | +             | +                  | +             |
| 7  | Male   | 66               | Stomach cancer    | -          | +             | +                  | +             |
| 8  | Female | 64               | Stomach cancer    | -          | +             | +                  | +             |
| 9  | Male   | 58               | Pancreatic cancer | -          | +             | +                  | +             |
| 10 | Female | 62               | Pancreatic cancer | +          | +             | +                  | +             |
| 11 | Male   | 53               | Pancreatic cancer | +          | +             | +                  | +             |
| 12 | Female | 61               | Pancreatic cancer | +          | +             | +                  | +             |
| 13 | Male   | 64               | Pancreatic cancer | +          | +             | +                  | +             |
| 14 | Male   | 73               | Pancreatic cancer | -          | +             | +                  | +             |
| 15 | Female | 61               | Pancreatic cancer | -          | +             | +                  | +             |
| 16 | Male   | 52               | Pancreatic cancer | +          | +             | +                  | +             |
| 17 | Female | 67               | Pancreatic cancer | +          | +             | +                  | +             |
| 18 | Male   | 86               | Pancreatic cancer | +          | +             | +                  | +             |
| 19 | Female | 52               | Lung cancer       | -          | +             | -                  | -             |
| 20 | Male   | 63               | Lung cancer       | +          | +             | -                  | -             |
| 21 | Female | 64               | Lung cancer       | -          | +             | -                  | -             |
| 22 | Female | 69               | Lung cancer       | -          | +             | -                  | -             |
| 23 | Female | 65               | Lung cancer       | -          | +             | -                  | -             |
| 24 | Male   | 66               | Lung cancer       | -          | +             | -                  | -             |
| 25 | Female | 66               | Lung cancer       | -          | +             | -                  | -             |
| 26 | Male   | 56               | Lung cancer       | -          | +             | -                  | -             |
| 27 | Female | 43               | Lung cancer       | +          | +             | -                  | -             |

“+” represents positive expression; “-” represents negative expression.



**eFigure 1.** Results of PCR Tests Performed to Detect HBV DNA and cccDNA in the Tissues of all Stomach Cancer Subjects

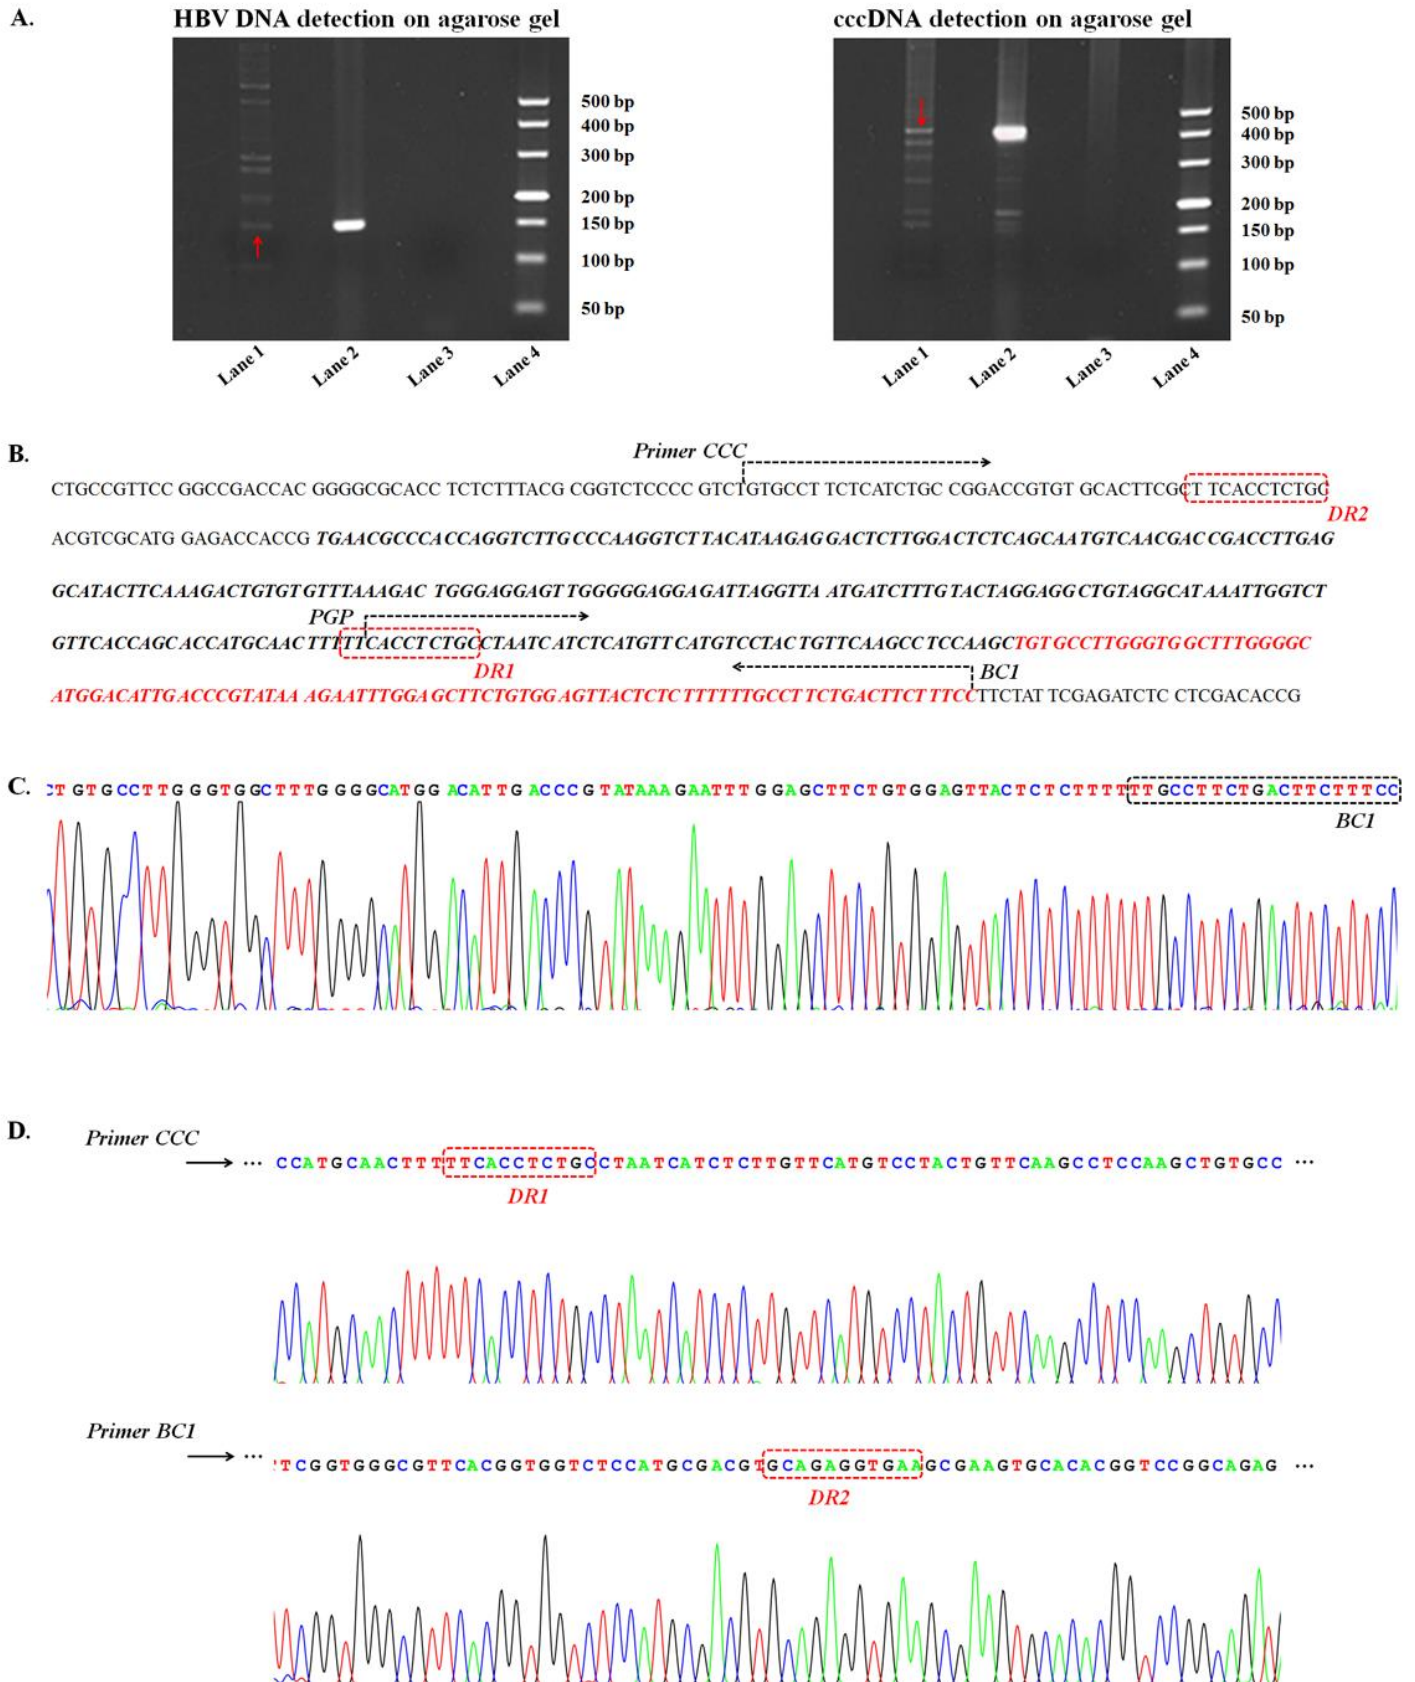

**eFigure 2.** Anti-HBc and HBx Expression in Tissues of Stomach Cancer, Pancreatic Cancer, or Lung Cancer Using the IHC Test

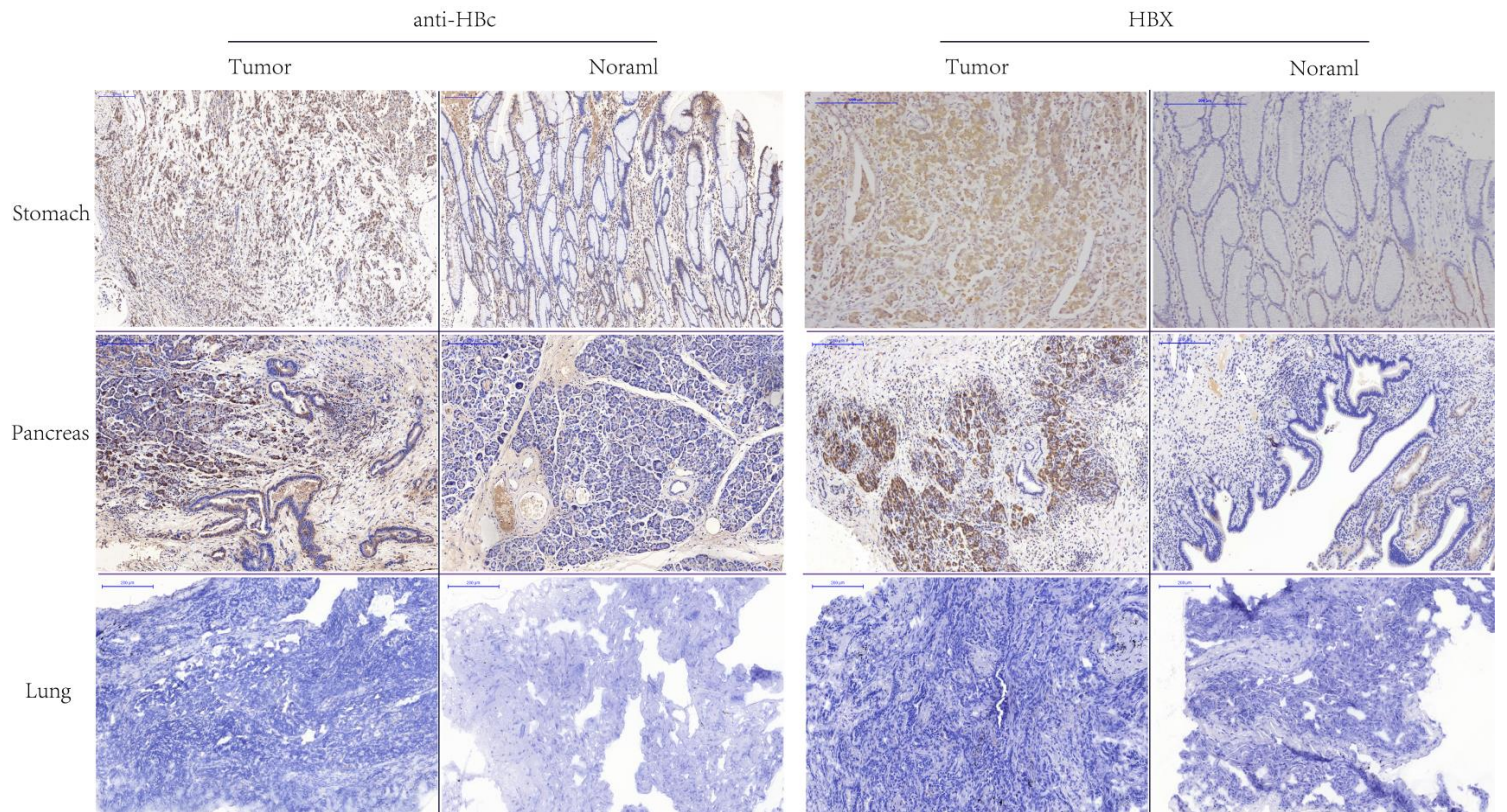

Supplement: jamanetwopen-2-e195718-s001.pdf [file jamanetwopen-2-e195718-s001.pdf]
